# Supplementary material
Source: Springer Nature journal article supplement (https://www.springermedizin.de/resource/supplementary/12889_2013_7053_MOESM2_ESM.pdf/9499714)

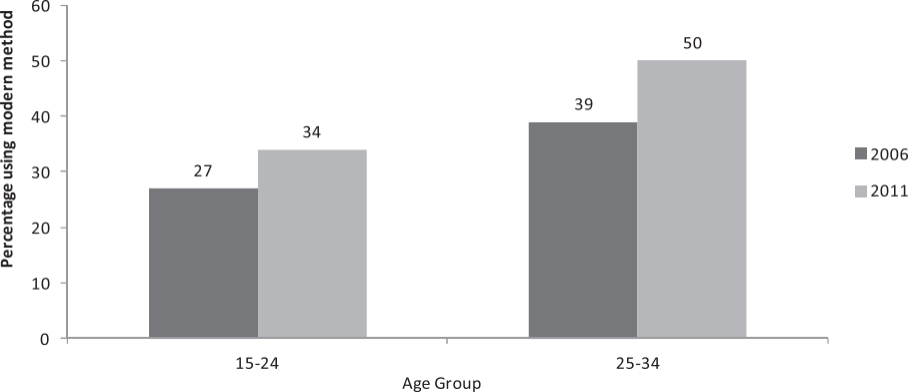

Supplement: MOESM2 [file 9499714]
